# Supplementary material for: Intraclade Variability in Toxin Production and Cytotoxicity of Bacillus cereus Group Type Strains and Dairy-Associated Isolates
Source: PubMed Central journal article supplement (PMC5835744; doi:10.1128/aem.02479-17), 2018-03-01
Supplement: AEM.02479-17_zam006188379s1.pdf [file AEM.02479-17_zam006188379s1.pdf]

| Isolate ID              | Clade <sup>1</sup> | <i>rpoB</i><br>AT <sup>2</sup> | MLST<br>Type | SR/RefSeq<br>Accession | Growth<br>at 6°C <sup>3</sup> | Hemolytic <sup>3</sup> | PI-<br>PLC <sup>3,4</sup> | Lecithinase <sub>3</sub> | NheB <sup>3,5</sup> | Hbl-L2 <sup>3,5</sup> | <i>hblA</i> <sup>3</sup> | <i>hblC</i> <sup>3</sup> | <i>hblD</i> <sup>3</sup> | <i>nheA</i> <sup>3</sup> | <i>nheB</i> <sup>3</sup> | <i>nheC</i> <sup>3</sup> | <i>cytK</i> <sup>3</sup> | <i>entFM</i> <sup>3</sup> | Cytotoxicity<br>Average <sup>6</sup> |
|-------------------------|--------------------|--------------------------------|--------------|------------------------|-------------------------------|------------------------|---------------------------|--------------------------|---------------------|-----------------------|--------------------------|--------------------------|--------------------------|--------------------------|--------------------------|--------------------------|--------------------------|---------------------------|--------------------------------------|
| FSL K6-0268             | IV                 | 409                            | 230          | SRR5185034             | -                             | +                      | +                         | +                        | +                   | -                     | +                        | +                        | +                        | +                        | +                        | +                        | +                        | +                         | 0.01                                 |
| FSL K6-1030             | IV                 | 556                            | 1191         | SRR4661783             | -                             | -                      | -                         | +                        | +                   | -                     | +                        | -                        | +                        | +                        | +                        | +                        | +                        | +                         | 0.00                                 |
| FSL M8-0139             | IV                 | 424                            | 138          | SRR5185026             | -                             | -                      | +                         | +                        | +                   | -                     | -                        | -                        | -                        | +                        | +                        | +                        | +                        | +                         | 0.00                                 |
| FSL R5-0184             | IV                 | 277                            | 927          | SRR5185020             | -                             | +                      | +                         | +                        | +                   | +                     | +                        | +                        | +                        | +                        | +                        | +                        | +                        | +                         | 1.00                                 |
| FSL R5-0585             | IV                 | 278                            | 1143         | SRR5185019             | -                             | +                      | +                         | +                        | +                   | -                     | +                        | +                        | +                        | +                        | +                        | +                        | +                        | +                         | 0.01                                 |
| FSL R5-0859             | IV                 | 158                            | 1099         | SRR5185016             | -                             | +                      | +                         | +                        | +                   | +                     | +                        | +                        | +                        | +                        | +                        | +                        | +                        | +                         | 0.00                                 |
| FSL W7-1101             | IV                 | 296                            | 1100         | SRR5185011             | -                             | +                      | +                         | +                        | +                   | +                     | +                        | +                        | +                        | +                        | +                        | +                        | +                        | +                         | 0.30                                 |
| FSL W7-1334             | IV                 | 304                            | 265          | SRR5185009             | -                             | +                      | +                         | +                        | -                   | +                     | +                        | +                        | +                        | +                        | +                        | +                        | -                        | +                         | 0.00                                 |
| FSL W8-0640             | IV                 | 154                            | 1089         | SRR2541688             | -                             | +                      | +                         | +                        | +                   | +                     | +                        | +                        | +                        | +                        | +                        | +                        | +                        | +                         | 0.00                                 |
| FSL W8-0824             | IV                 | 92                             | 24           | SRR2541693             | -                             | +                      | +                         | +                        | +                   | +                     | +                        | +                        | +                        | +                        | +                        | +                        | +                        | +                         | 0.64                                 |
| ATCC 14579 <sup>T</sup> | IV                 | 158                            | 4            | NC_004722.1            | -                             | +                      | +                         | +                        | +                   | +                     | +                        | +                        | +                        | +                        | +                        | +                        | +                        | +                         | 0.99                                 |
| ATCC 10792 <sup>T</sup> | IV                 | 689                            | 10           | NC_005957.1            | -                             | +                      | +                         | +                        | +                   | +                     | +                        | +                        | +                        | +                        | +                        | +                        | +                        | +                         | 0.76                                 |
| FSL M8-0214             | V                  | 412                            | 223          | SRR5185025             | -                             | +                      | +                         | +                        | +                   | +                     | +                        | +                        | +                        | +                        | +                        | +                        | -                        | +                         | 0.42                                 |
| FSL H8-0482             | V                  | 129                            | 223          | SRR2541601             | -                             | +                      | +                         | +                        | +                   | -                     | +                        | +                        | +                        | +                        | +                        | +                        | -                        | +                         | 0.01                                 |
| BCT-7112 <sup>T</sup>   | V                  | 129                            | 111          | NC_022781.1            | -                             | +                      | +                         | +                        | +                   | +                     | +                        | +                        | +                        | +                        | +                        | +                        | -                        | +                         | 0.02                                 |
| FSL H7-0683             | VI                 | 75                             | 222          | SRR4064645             | +                             | -                      | +                         | +                        | -                   | -                     | +                        | +                        | +                        | +                        | +                        | +                        | -                        | +                         | 0.00                                 |
| FSL E2-0214             | VI                 | 531                            | 410          | SRR4661781             | +                             | +                      | +                         | +                        | -                   | -                     | +                        | +                        | +                        | -                        | +                        | +                        | -                        | +                         | 0.00                                 |
| FSL H7-0926             | VI                 | 90                             | 667          | SRR2541537             | +                             | +                      | +                         | +                        | -                   | -                     | +                        | +                        | +                        | +                        | +                        | +                        | -                        | +                         | 0.00                                 |
| FSL H8-0485             | VI                 | 132                            | 1142         | SRR5189059             | +                             | -                      | +                         | +                        | +                   | -                     | -                        | +                        | +                        | +                        | +                        | +                        | -                        | +                         | 0.00                                 |
| FSL H8-0492             | VI                 | 134                            | 1098         | SRR4661790             | +                             | -                      | +                         | +                        | -                   | -                     | +                        | +                        | +                        | +                        | +                        | +                        | -                        | +                         | 0.00                                 |
| FSL J3-0123             | VI                 | 513                            | 1095         | SRR5189058             | +                             | +                      | +                         | +                        | +                   | -                     | +                        | +                        | +                        | +                        | +                        | +                        | -                        | +                         | 0.00                                 |
| FSL M7-0109             | VI                 | 273                            | 410          | SRR5189057             | +                             | +                      | +                         | +                        | +                   | -                     | +                        | +                        | +                        | -                        | +                        | +                        | -                        | +                         | 0.00                                 |
| FSL M7-0669             | VI                 | 3                              | 655          | SRR5189065             | +                             | +                      | +                         | +                        | +                   | -                     | +                        | +                        | +                        | -                        | +                        | +                        | -                        | +                         | 0.00                                 |

| Isolate ID              | Clade <sup>1</sup> | <i>rpoB</i> AT <sup>2</sup> | MLST Type | SR/RefSeq Accession | Growth at 6°C <sup>3</sup> | Hemolytic <sup>3</sup> | PI-PLC <sup>3,4</sup> | Lecithinase <sub>3</sub> | NheB <sup>3,5</sup> | Hbl-L2 <sup>3,5</sup> | <i>hblA</i> <sup>3</sup> | <i>hblC</i> <sup>3</sup> | <i>hblD</i> <sup>3</sup> | <i>nheA</i> <sup>3</sup> | <i>nheB</i> <sup>3</sup> | <i>nheC</i> <sup>3</sup> | <i>cytK</i> <sup>3</sup> | <i>entFM</i> <sup>3</sup> | Cytotoxicity Average <sup>6</sup> |
|-------------------------|--------------------|-----------------------------|-----------|---------------------|----------------------------|------------------------|-----------------------|--------------------------|---------------------|-----------------------|--------------------------|--------------------------|--------------------------|--------------------------|--------------------------|--------------------------|--------------------------|---------------------------|-----------------------------------|
| FSL M7-1219             | VI                 | 97                          | 1092      | SRR5189064          | +                          | +                      | +                     | +                        | +                   | -                     | +                        | +                        | +                        | +                        | +                        | +                        | -                        | +                         | 0.00                              |
| FSL R5-0708             | VI                 | 257                         | 1144      | SRR5189062          | +                          | +                      | +                     | +                        | +                   | -                     | +                        | +                        | +                        | +                        | +                        | +                        | -                        | +                         | 0.00                              |
| FSL W7-1108             | VI                 | 342                         | 673       | SRR5189056          | +                          | +                      | +                     | +                        | +                   | -                     | +                        | +                        | +                        | +                        | +                        | +                        | -                        | +                         | 0.00                              |
| DSM 2048 <sup>T</sup>   | VI                 | 3                           | 116       | NZ_CP009692.1       | +                          | +                      | +                     | +                        | +                   | -                     | +                        | +                        | +                        | -                        | +                        | +                        | -                        | +                         | 0.00                              |
| WSBC 10204 <sup>T</sup> | VI                 | 3                           | 196       | NZ_CP009746.1       | +                          | -                      | +                     | +                        | +                   | -                     | +                        | +                        | +                        | +                        | +                        | +                        | -                        | +                         | 0.00                              |
| NVH 391-98 <sup>T</sup> | VII                | 688                         | 930       | NC_009674.1         | -                          | +                      | -                     | +                        | -                   | -                     | -                        | -                        | -                        | -                        | -                        | -                        | +                        | +                         | 0.25                              |

<sup>1</sup> Phylogenetic group determined based on concatenated 7-gene MLST sequences.

<sup>2</sup> AT refers to *rpoB* allelic type; determined based on 632 nucleotide sequence of *rpoB*.

<sup>3</sup> “+” denotes the bacterial isolate was positive for a given virulence factor, “-” denotes the virulence factor was not detected. Data presented are based on PCR amplification of target genes.

<sup>4</sup> PI-PLC refers to phosphoinositide phospholipase C activity as determined by plating isolates on *Bacillus cereus*/*Bacillus thuringiensis* chromogenic plating medium.

<sup>5</sup> Lecithinase activity determined by plating isolate on Bacara agar.

<sup>6</sup> Proportion of HeLa cells that were positive for propidium iodide staining, following a 30 minute co-incubation with supernatants (5% v/v) from bacterial cultures grown at 37°C. Results are averaged from two independent experiments.

**Table S2.** P-values of statistical analyses of associations between virulence factors and phylogenetic clades and cytotoxicity

| Association tested <sup>1,2</sup>                                    | P-value for overall associations <sup>3</sup> | P-values for significant associations with specific phylogenetic clades <sup>4,5,6</sup> |
|----------------------------------------------------------------------|-----------------------------------------------|------------------------------------------------------------------------------------------|
| <b>Association between phylogenetic clades and virulence factors</b> |                                               |                                                                                          |
| PI-PLC Activity                                                      | P < 0.001                                     | I: P < 0.001                                                                             |
| Hemolysis                                                            | P = 0.720                                     | ND                                                                                       |
| Growth at 6°C                                                        | P < 0.001                                     | III: P = 0.043<br>IV: P = 0.002<br>VI: P < 0.001                                         |
| <i>hblCDA</i> gene presence                                          | P < 0.001                                     | III: P < 0.001<br>VI: P = 0.047                                                          |
| <i>nheABC</i> gene presence                                          | P = 0.032                                     | VII: P = 0.019                                                                           |
| <i>entFM</i> gene presence                                           | P < 0.001                                     | I: P < 0.001                                                                             |
| <i>cytK</i> gene presence                                            | P < 0.001                                     | I: P = 0.025<br>IV: P < 0.001<br>VI: P < 0.001                                           |
| Hbl-L2 Immunoassay Detection                                         | P < 0.001                                     | IV: P < 0.001<br>VI: P = 0.005                                                           |
| NheB Immunoassay Detection                                           | P < 0.001                                     | I: P < 0.001<br>IV: P = 0.043                                                            |
| Cytotoxicity                                                         | P < 0.001                                     | I: P = 0.001<br>VI: P = 0.002                                                            |
| <b>Cytotoxicity versus presence/absence of selected genes</b>        |                                               |                                                                                          |
| <i>hblCDA</i>                                                        | P = 1.000                                     | NA                                                                                       |
| <i>cytK</i>                                                          | P = 0.316                                     | NA                                                                                       |
| <i>nheABC</i>                                                        | P = 0.422                                     | NA                                                                                       |
| <b>Cytotoxicity versus immunoassay detection of Hbl-L2 and NheB</b>  |                                               |                                                                                          |
| Hbl-L2                                                               | P = 0.098                                     | NA                                                                                       |
| NheB                                                                 | P = 0.140                                     | NA                                                                                       |

<sup>1</sup> Includes both *cytK-1* and *cytK-2*.

<sup>2</sup> Considered *hblCDA* or *nheABC* positive if at least one gene in the toxin gene operon was detected via PCR.

<sup>3</sup> P-values from Fisher's exact tests, corrected using False Discovery Rate for multiple comparisons.

<sup>4</sup> P-values from Fisher's exact tests, uncorrected.

<sup>5</sup> ND = not determined (i.e. analysis not performed).

<sup>6</sup> NA = not applicable.

**Table S3.** Number and proportion of PCR-positive results for toxin genes.

| Clade | Gene <sup>1</sup> |             |             |             |             |             |             |              |
|-------|-------------------|-------------|-------------|-------------|-------------|-------------|-------------|--------------|
|       | <i>hblA</i>       | <i>hblC</i> | <i>hblD</i> | <i>nheA</i> | <i>nheB</i> | <i>nheC</i> | <i>cytK</i> | <i>entFM</i> |
| I     | 6 (1.00)          | 5 (0.83)    | 6 (1.00)    | 0 (0.00)    | 0 (0.00)    | 6 (1.00)    | 0 (0.00)    | 1 (0.17)     |
| II    | 2 (0.40)          | 3 (0.60)    | 3 (0.60)    | 5 (1.00)    | 5 (1.00)    | 5 (1.00)    | 2 (0.40)    | 5 (1.00)     |
| III   | 2 (0.22)          | 2 (0.22)    | 2 (0.22)    | 9 (1.00)    | 9 (1.00)    | 9 (1.00)    | 7 (0.78)    | 9 (1.00)     |
| IV    | 14 (0.93)         | 13 (0.87)   | 14 (0.93)   | 15 (1.00)   | 15 (1.00)   | 15 (1.00)   | 14 (0.93)   | 15 (1.00)    |
| V     | 3 (1.00)          | 3 (1.00)    | 3 (1.00)    | 3 (1.00)    | 3 (1.00)    | 3 (1.00)    | 0 (0.00)    | 3 (1.00)     |
| VI    | 12 (0.92)         | 13 (1.00)   | 13 (1.00)   | 9 (0.69)    | 13 (1.00)   | 13 (1.00)   | 0 (0.00)    | 13 (1.00)    |
| VII   | 0 (0.00)          | 0 (0.00)    | 0 (0.00)    | 0 (0.00)    | 0 (0.00)    | 0 (0.00)    | 1 (1.00)    | 1 (1.00)     |
| Total | 39 (0.75)         | 39 (0.75)   | 41 (0.79)   | 41 (0.79)   | 45 (0.87)   | 51 (0.98)   | 24 (0.46)   | 47 (0.90)    |

<sup>1</sup>Number and proportion (in parentheses) of isolates in a given clade that were PCR-positive for gene

**Table S4.** Number of isolates with positive results for toxin genes using WGS data, within each clade.

| Clade | Gene <sup>1</sup> |        |             |        |             |        |             |        |             |        |             |        |             |        |              |        |
|-------|-------------------|--------|-------------|--------|-------------|--------|-------------|--------|-------------|--------|-------------|--------|-------------|--------|--------------|--------|
|       | <i>hblA</i>       |        | <i>hblC</i> |        | <i>hblD</i> |        | <i>nheA</i> |        | <i>nheB</i> |        | <i>nheC</i> |        | <i>cytK</i> |        | <i>entFM</i> |        |
| I     | 6                 | (1.00) | 5           | (0.83) | 4           | (0.67) | 0           | (0.00) | 3           | (0.50) | 4           | (0.67) | 0           | (0.00) | 0            | (0.00) |
| II    | 2                 | (0.40) | 3           | (0.60) | 3           | (0.60) | 5           | (1.00) | 5           | (1.00) | 5           | (1.00) | 2           | (0.40) | 5            | (1.00) |
| III   | 2                 | (0.22) | 2           | (0.22) | 2           | (0.22) | 9           | (1.00) | 9           | (1.00) | 9           | (1.00) | 7           | (0.78) | 9            | (1.00) |
| IV    | 14                | (0.93) | 14          | (0.93) | 13          | (0.87) | 15          | (1.00) | 15          | (1.00) | 15          | (1.00) | 14          | (0.93) | 14           | (0.93) |
| V     | 3                 | (1.00) | 3           | (1.00) | 3           | (1.00) | 3           | (1.00) | 3           | (1.00) | 3           | (1.00) | 0           | (0.00) | 3            | (1.00) |
| VI    | 13                | (1.00) | 10          | (0.77) | 13          | (1.00) | 13          | (1.00) | 13          | (1.00) | 13          | (1.00) | 0           | (0.00) | 13           | (1.00) |
| VII   | 0                 | (0.00) | 0           | (0.00) | 0           | (0.00) | 0           | (0.00) | 0           | (0.00) | 0           | (0.00) | 1           | (1.00) | 1            | (1.00) |
| Total | 40                | (0.77) | 37          | (0.71) | 38          | (0.73) | 45          | (0.87) | 48          | (0.92) | 49          | (0.94) | 24          | (0.46) | 45           | (0.87) |

<sup>1</sup> Proportion of isolates in a given clade that were PCR-positive for gene
